# Supplementary material for: Modifications to a rainfall-streamflow model to handle &quot;non-stationarity&quot;
Source: Copernicus journal article supplement (doi:10.5194/piahs-371-29-2015), 2015-06-12
Supplement: Supplementary file 1 [file piahs-371-29-2015-supplement.zip]

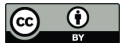

## *Supplement of*

# **Modifications to a rainfall-streamflow model to handle “non-stationarity”**

**B. F. W. Croke and M.-J. Shin**

*Correspondence to:* B. F. W. Croke ([barry.croke@anu.edu.au](mailto:barry.croke@anu.edu.au))

- [piahs-371-29-2015-supplement-cover-letter.pdf](#)
- [Figure 1.csv](#)
- [Figure 2.csv](#)
- [Figure 4.csv](#)
- [population.xlsx](#)

The copyright of individual parts of the supplement might differ from the CC-BY 3.0 licence.
